# Supplementary material for: A three-dimensional multilevel nanoporous NiCoO2/Ni hybrid for highly reversible electrochemical energy storage
Source: Royal Society of Chemistry journal article supplement (doi:10.1039/c9ta03324f), 2019-01-01
Supplement: c9ta03324f1.pdf [file c9ta03324f1.pdf]

Supplementary Material for:

**Three-Dimensional Multilevel Nanoporous NiCoO<sub>2</sub>/Ni Hybrid for Highly Reversible  
Electrochemical Energy Storage**

Binbin Liu,<sup>a</sup> Jiagang Hou,<sup>b</sup> Tingting Zhang,<sup>a</sup> Caixia Xu,<sup>a\*</sup> and Hong Liu<sup>ac\*</sup>

*<sup>a</sup>Collaborative Innovation Center of Technology and Equipement for Biological Diagnosis and Therapy in  
Universities of Shandong, Institute for Advanced Interdisciplinary Research (iAIR), University of Jinan, Jinan,  
250022, P. R. China*

*<sup>b</sup>Qilu University of Technology (Shandong Academy of Sciences)*

*Jinan 250353, Shandong Province, P. R. China*

*<sup>c</sup>State Key Laboratory of Crystal Materials, Shandong University*

*Jinan 250100, P. R. China*

Fax: +86-531-82767033; Tel: +86-531-82767033

E-mail: chm\_xucx@ujn.edu.cn; hongliu@sdu.edu.cn

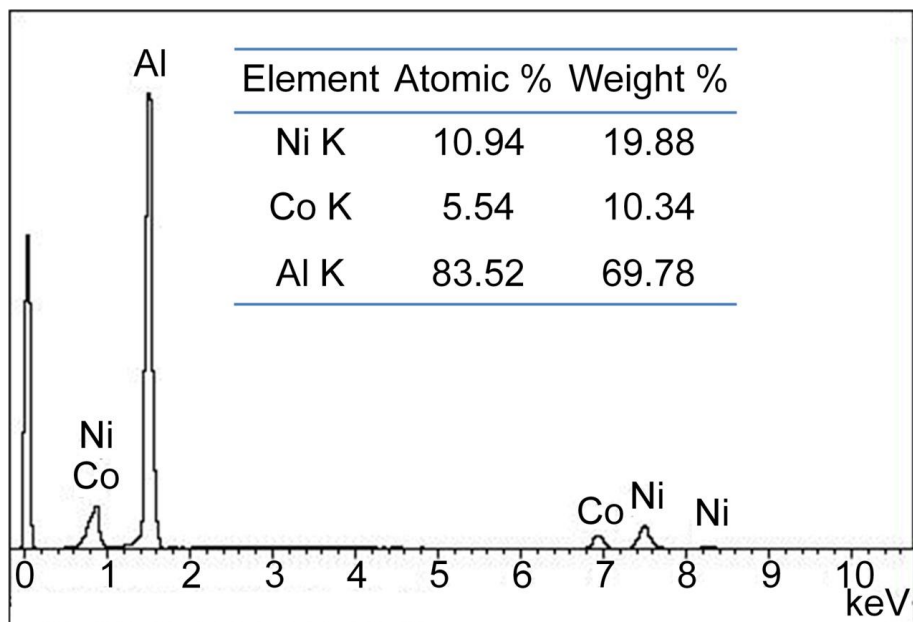

Fig. S1. EDS data of the Ni<sub>10</sub>Co<sub>5</sub>Al<sub>85</sub> precursor alloy.

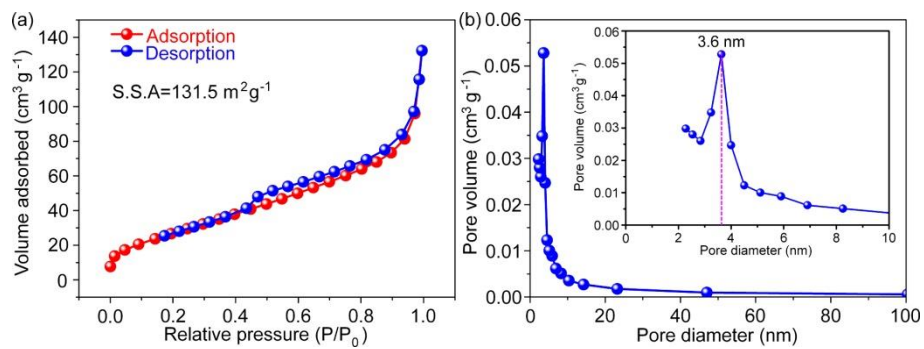

**Fig. S2.** The  $N_2$  adsorption-desorption isotherms and BJH pore size distribution curves of the  $NiCoO_2/Ni$  hybrid after etching the  $Ni_{10}Co_5Al_{85}$  alloy.

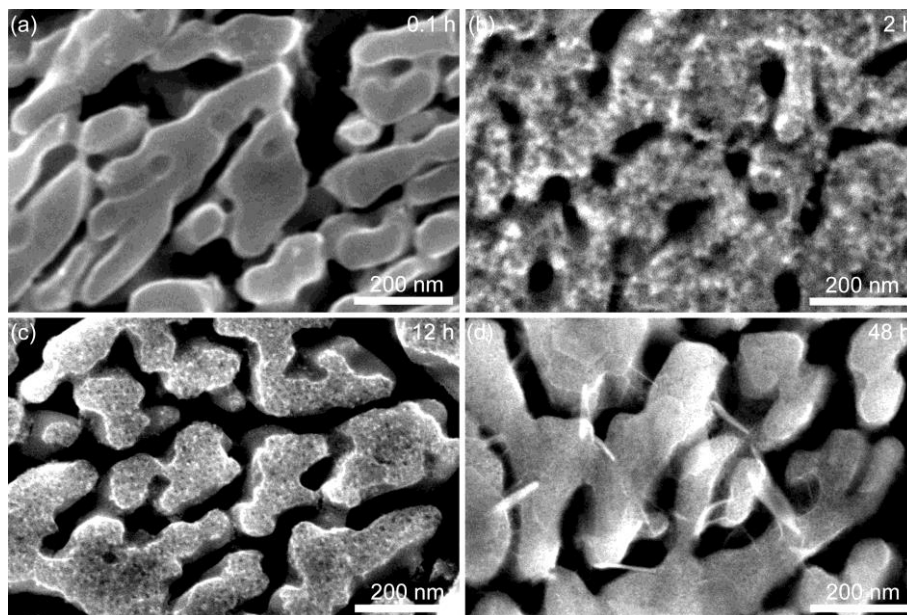

**Fig. S3.** SEM images of the dealloyed samples at different corrosion times for (a) 0.1 h, (b) 2 h, (c) 12 h, and (d) 48 h, respectively.

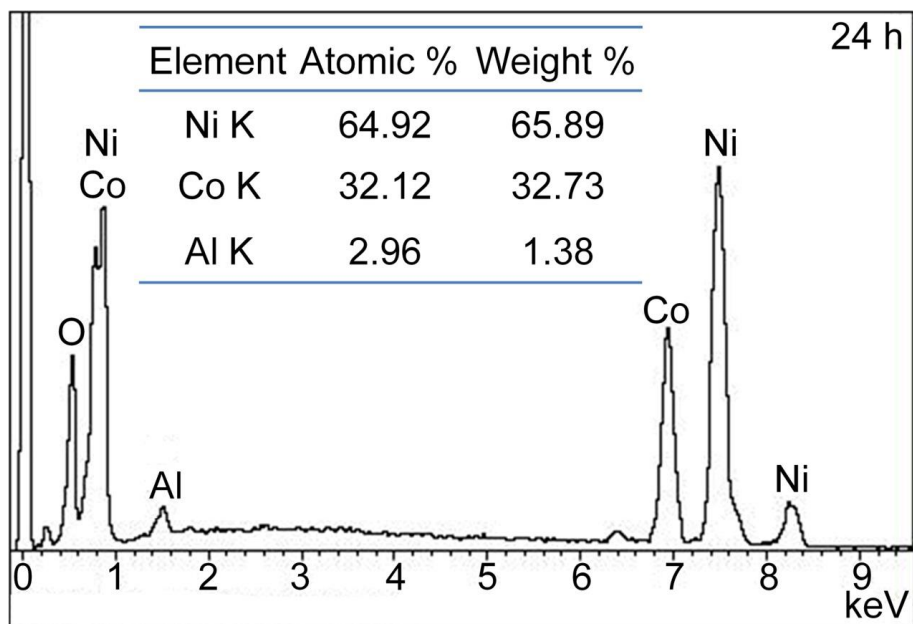

Fig. S4. EDS data of the NiCoO<sub>2</sub>/Ni product upon dealloying for 24 h.

| Time<br>(h) | Ni K<br>(Atomic/Weight %) | Co K<br>(Atomic/Weight %) | Al K<br>(Atomic/Weight %) |
|-------------|---------------------------|---------------------------|---------------------------|
| 0.1         | 54.26/60.57               | 26.25/29.42               | 19.49/10.01               |
| 2           | 56.91/61.07               | 30.21/32.56               | 12.88/6.37                |
| 12          | 58.72/62.58               | 29.65/31.72               | 11.63/5.70                |
| 24          | 64.92/65.89               | 32.12/32.73               | 2.96/1.38                 |
| 48          | 65.08/65.93               | 32.30/32.85               | 2.62/1.22                 |

Fig. S5. EDS data of the products with different dealloying times.

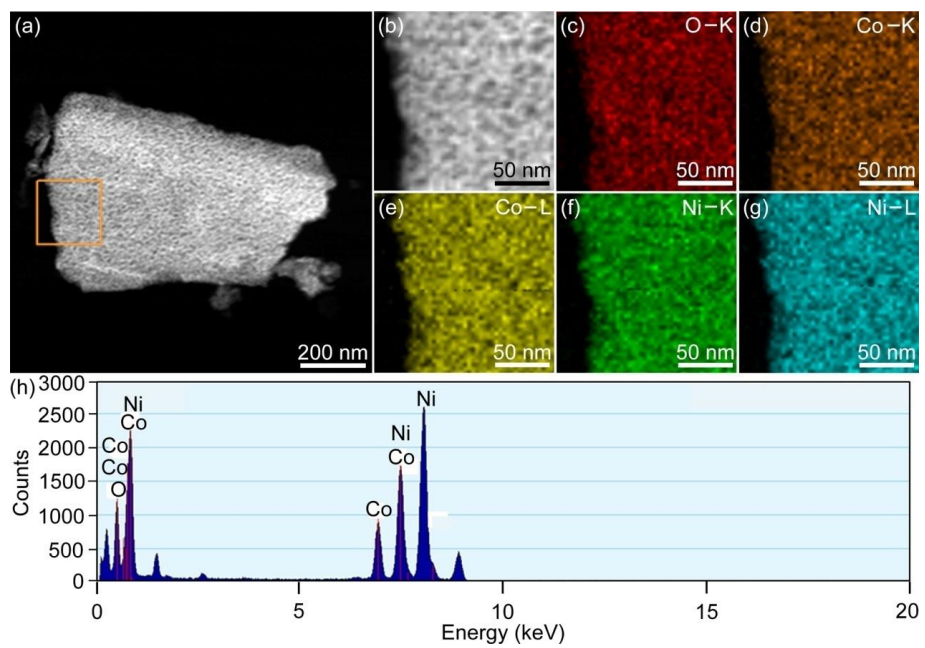

**Fig. S6.** EDS elemental mapping of the NiCoO<sub>2</sub>/Ni hybrid.

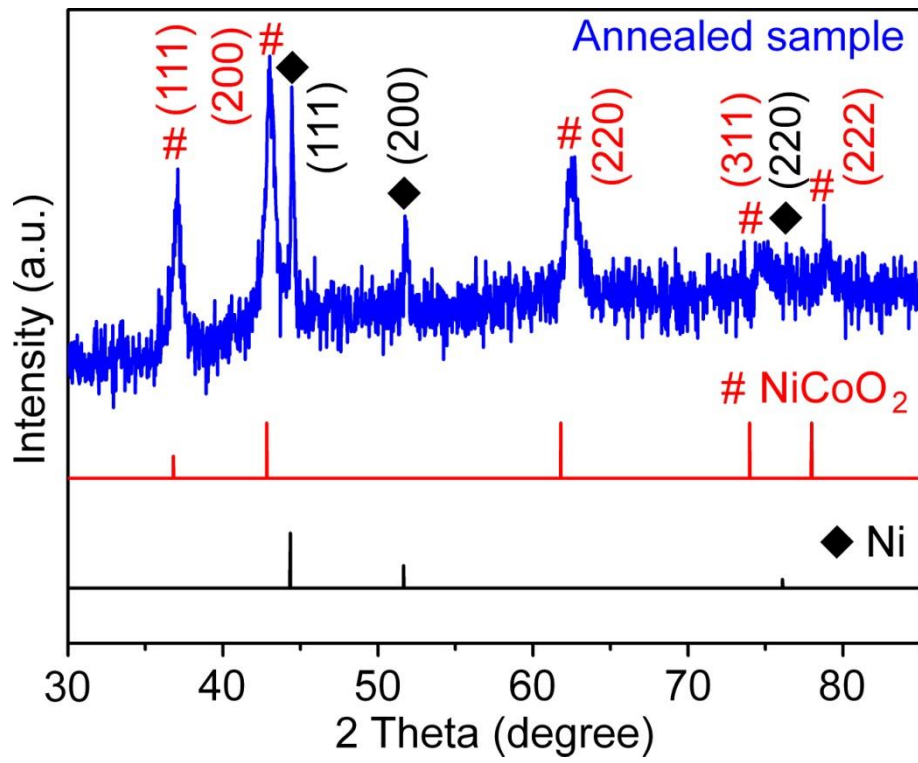

**Fig. S7.** XRD pattern of the dealloyed product annealed at 600 °C for 2 h. The standard patterns of NiCoO<sub>2</sub> (JCPDS 10-0188) and Ni (JCPDS 65-0380) are included for comparison.



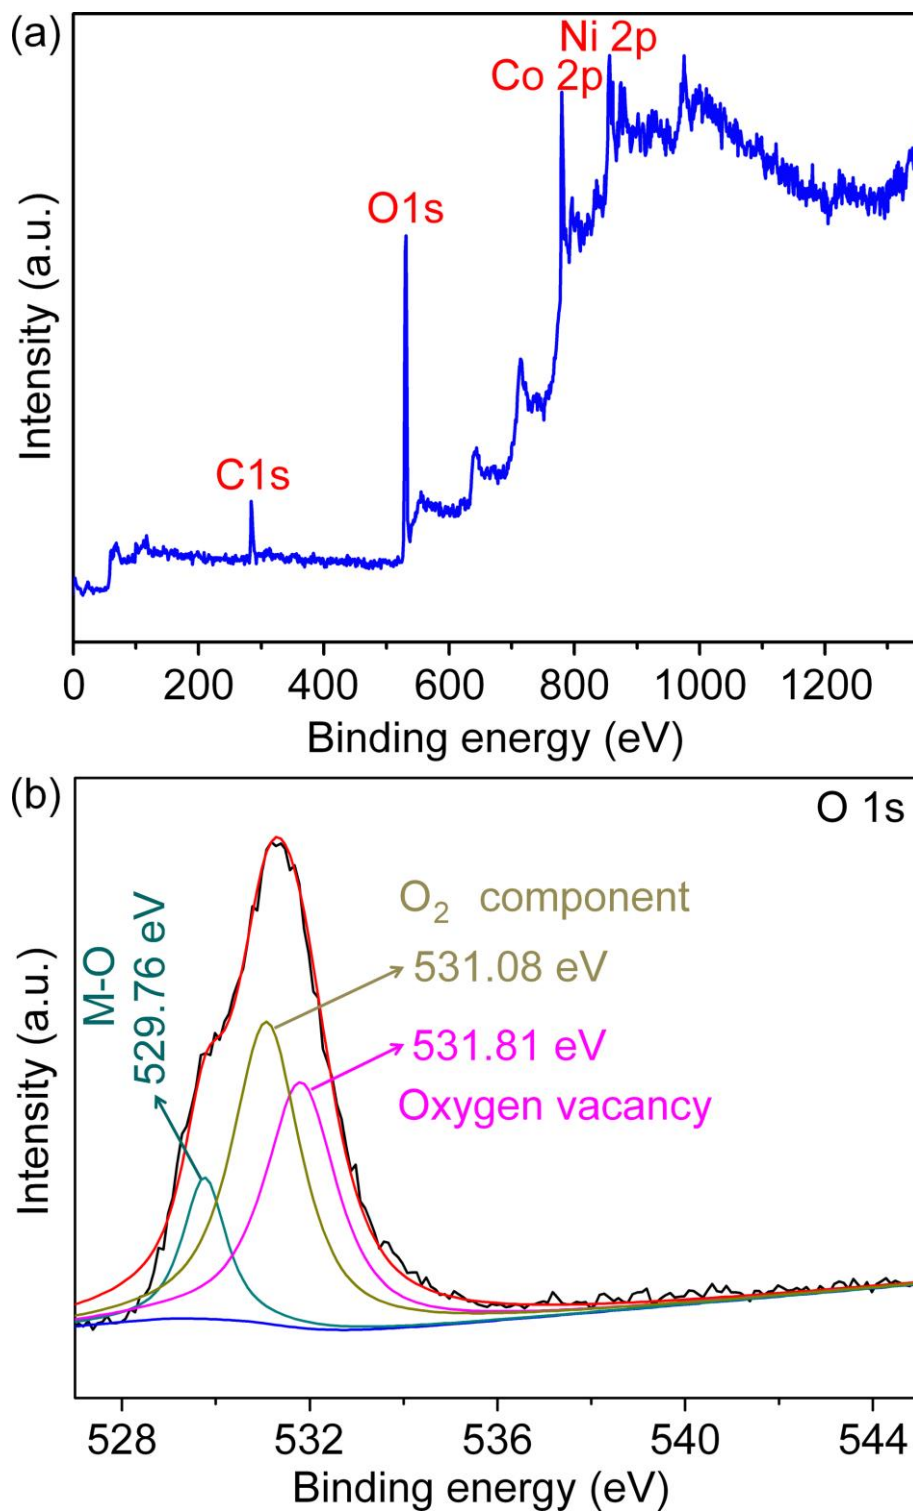

Fig. S8. (a) XPS data for NiCoO<sub>2</sub>/Ni, (b) high-resolution XPS for the O 1s in NiCoO<sub>2</sub>/Ni hybrid.

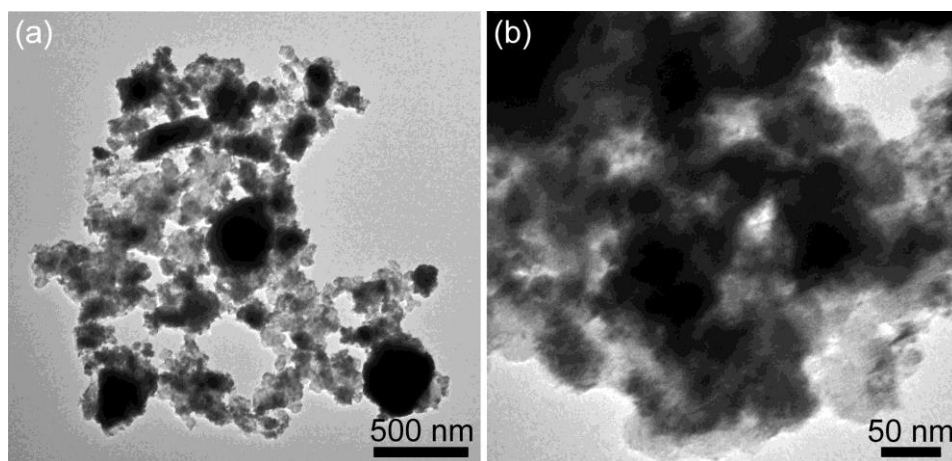

**Fig. S9.** TEM images of the NiCoO<sub>2</sub>/Ni hybrid after 5000 CV cycles.

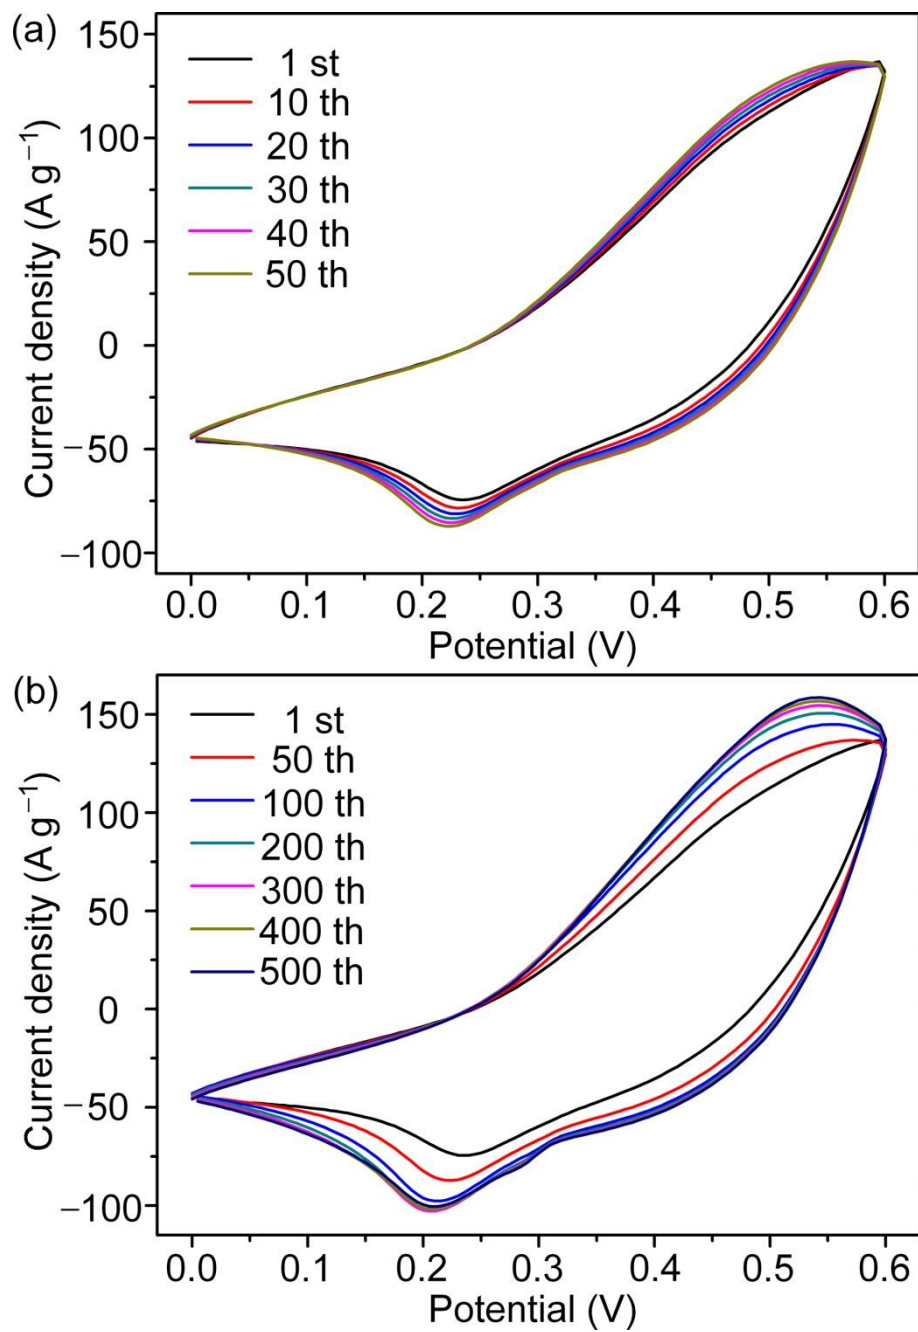

**Fig. S10.** (a&b) CV curves (50 mV s<sup>-1</sup>) of the NiCoO<sub>2</sub>/Ni electrode with different cycles as indicated.

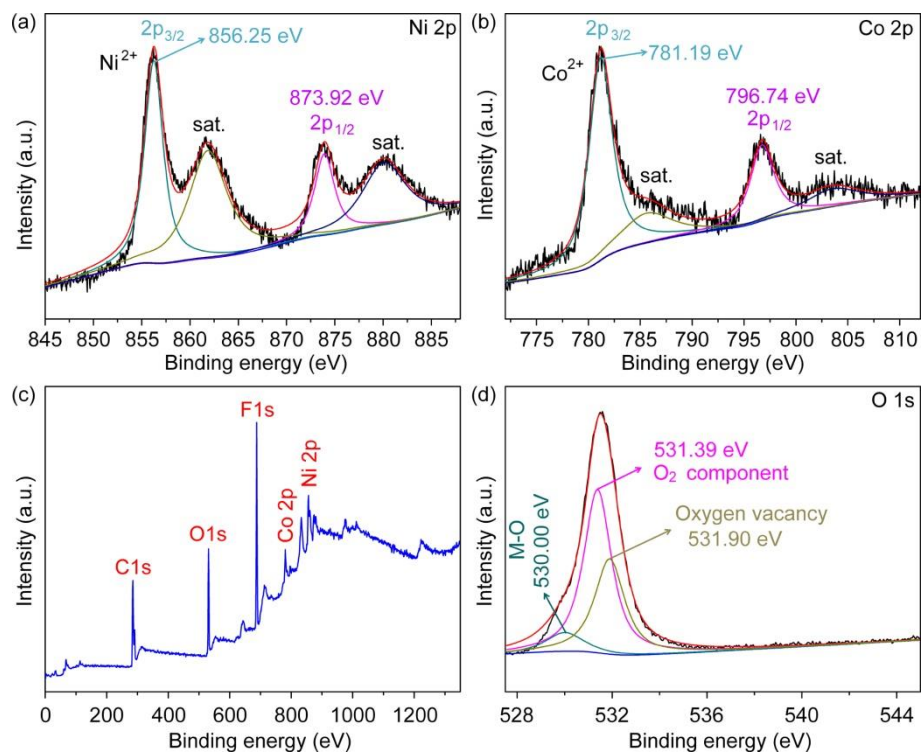

**Fig. S11.** XPS date of the  $\text{NiCoO}_2/\text{Ni}$  hybrid after 200 CV cycles.

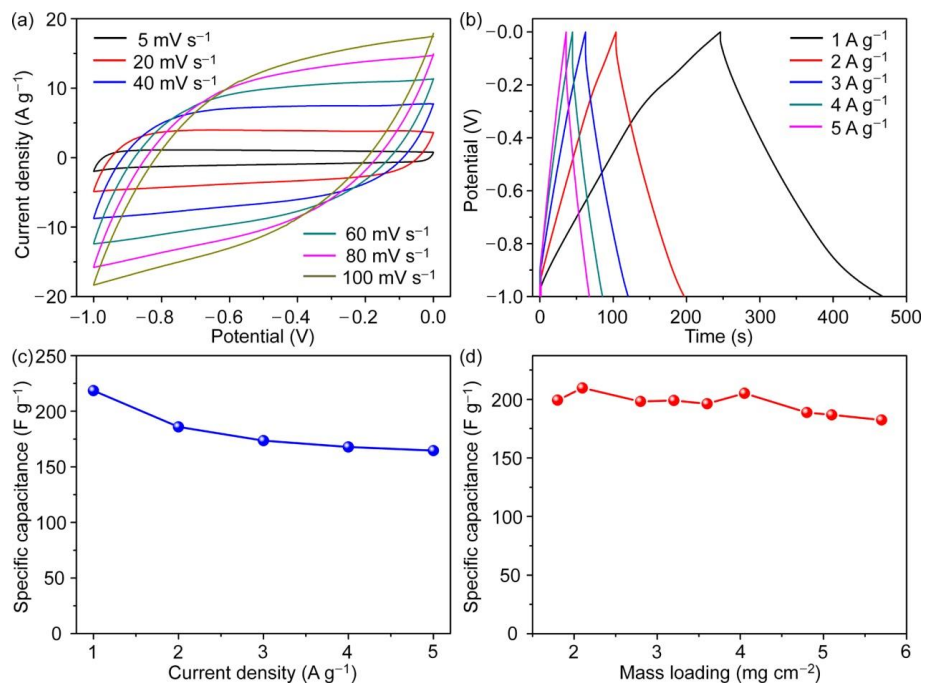

**Fig. S12.** (a) CV curves, (b) GCD curves, (c) specific capacitance at different current densities of the AC anode, (d) specific capacitance of different electrodes with various mass loading.

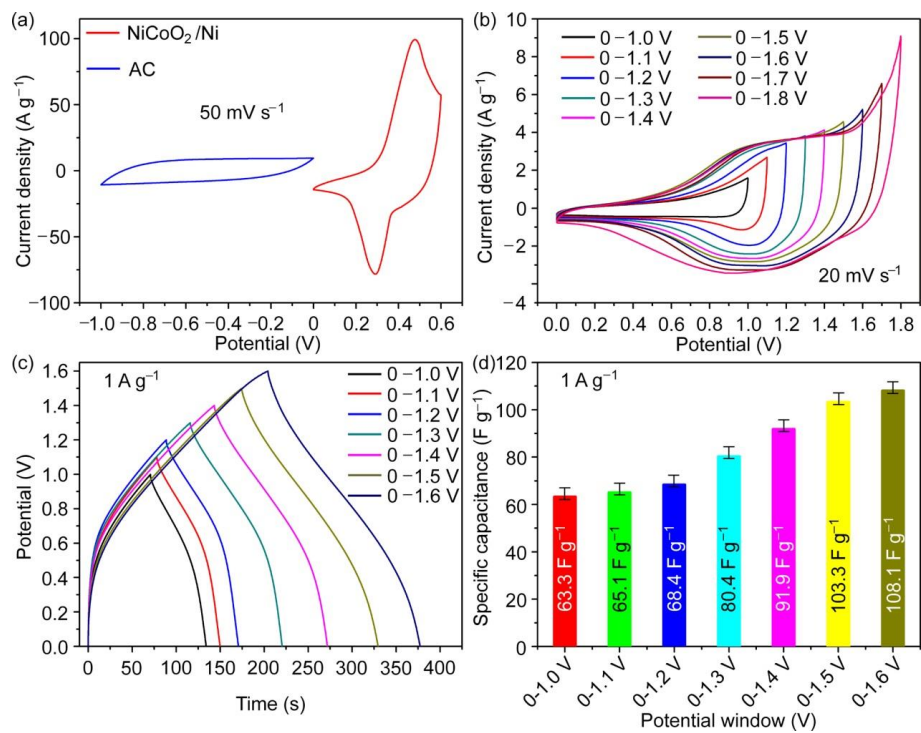

**Fig. S13.** (a) CV curves of AC and NiCoO<sub>2</sub>/Ni electrodes, (b) CV curves, (c) GCD curves of the ASC at different potential windows, (d) Specific capacitance at different potential windows.
